# Supplementary material
Source: ML conference proceedings conference paper supplement (https://openreview.net/forum?id=CzAAbKOHQW)
Supplement: supplementary_material [file attachment]

## A Summary of datasets

We show experimental results on four datasets: a recidivism dataset (COMPAS) [29], the Fair Isaac (FICO) credit risk dataset [30] used for the Explainable ML Challenge, the Diabetes dataset [31], and an ICU dataset MIMIC-II [32]. Table 1 summarizes all the datasets. We note that these are real-world datasets using features that are known to be used in systems of this type. Specifically, the COMPAS dataset is a criminal recidivism dataset and we use features that are based on criminal history, age, etc. For FICO, the data were provided by FICO itself based on how credit scores are usually constructed. MIMIC-II is based on features observed in ICU patients that are predictive of death, and the Diabetes dataset also uses typical measurements taken during pregnancy that are indicative of diabetes. The features for each dataset are generally available for the decision and they are interpretable.

| Dataset  | Samples | Features | Classification task                                           |
|----------|---------|----------|---------------------------------------------------------------|
| COMPAS   | 6907    | 7        | Predict if someone will be arrested $\leq 2$ years of release |
| FICO     | 10459   | 23       | Predict if someone will default on a loan                     |
| Diabetes | 768     | 9        | Predict whether a pregnant woman has diabetes                 |
| MIMIC-II | 24508   | 17       | Predict whether a patient dies in the ICU                     |

Table 1: Summary of datasets

## B Sampling Uniformly from Ellipsoid

---

### Algorithm 1 *SampleFromEllipsoid*( $\mathbf{Q}, \omega_c$ )

---

**Input:** parameters of the ellipsoid  $\mathbf{Q} \in \mathbb{R}^{m \times m}$ ,  $\omega_c \in \mathbb{R}^m$   
**Output:** a point inside the ellipsoid  $\omega \in \mathbb{R}^m$   
1:  $\mathbf{u} \sim \mathcal{N}(\mathbf{0}, \mathbf{I})$  // *sample an  $m$  dimensional vector from standard multivariate Gaussian distribution*  
2:  $\mathbf{u} \leftarrow \mathbf{u} / \|\mathbf{u}\|_2$  // *normalize it to get a unit-vector*  
3:  $r \sim U(0, 1)$  // *get a sample from uniform distribution*  
4:  $r \leftarrow r^{1/m}$  // *rescale to get the radius of a sample in a unit sphere*  
5:  $\mathbf{y} \leftarrow r\mathbf{u}$  //  *$\mathbf{y}$  is a random point inside a unit sphere*  
6:  $\Lambda, \mathbf{V} = \text{Eig}(\mathbf{Q})$  // *Eigen-decomposition, diagonal of  $\Lambda$  are the eigenvalues, and columns of  $\mathbf{V}$  are eigenvectors*  
7:  $\mathbf{x} \leftarrow \Lambda^{-\frac{1}{2}} \mathbf{V}^T \mathbf{y}$  // *get a point in the ellipsoid  $\mathbf{x}^T \mathbf{Q} \mathbf{x} \leq 1$*   
8:  $\omega = \mathbf{x} + \omega_c$  // *shift it so that the center is  $\omega_c$*   
**return**  $\omega$

---

Algorithm 1 describes the algorithm to uniformly sample from the ellipsoid  $\{\omega \in \mathbb{R}^m : (\omega - \omega_c)^T \mathbf{Q} (\omega - \omega_c) \leq 1\}$ . The algorithm first samples a random point inside a high dimensional unit sphere (line 1-5), and applies a linear transformation (calculated from  $\mathbf{Q}$  and  $\omega_c$ ) to get the point in the target ellipsoid (line 6-8). The whole process can be decomposed into a purely stochastic part, i.e., sample in the unit sphere, and a deterministic part, which is differentiable. Using this sampling algorithm, we can get samples for objective (6) and use gradient-based methods to optimize  $\mathbf{Q}$  and  $\omega_c$ . In addition, the algorithm is also used to sample data for the problem in Section 4.3 and to calculate precisions in Section 5.1.

## C Precision and volume of the approximated Rashomon set

To run our method, we set the learning rate to 0.0001 and run 1000 iterations.  $C$  is set to 500. For the logistic regression and EBM baselines, we sample 2000 coefficient vectors by fitting GAMs on the bootstrap sampled subsets of data. We run logistic regression with  $\ell_2$  penalty and EBM with no interaction terms. We then find the minimum volume ellipsoid that can cover most coefficient vectors. Given a set of coefficient vectors  $\omega_{\text{samples}}$ , we solve the following problem:

$$\min_{\mathbf{Q}, \omega_c} -\det(\mathbf{Q})^{\frac{1}{2m}} + \xi \cdot \frac{1}{2000} \sum_{i=1}^{2000} \max(\|\mathbf{Q}^{1/2}(\omega_{\text{sample}_i} - \omega_c)\|^2 - 1, 0). \quad (13)$$

431 We solve this problem via gradient descent.  $\xi$  is set to 1000. The number of iterations and learning  
432 rate in GD are set to 1000 and 0.01, respectively. We initialize  $\mathbf{Q}$  by the ZCA whitening matrix and  
433  $\omega_c$  by the average of  $\omega_{\text{samples}}$ .

434 After rescaling the Rashomon set approximated by baselines, we sample 10,000 points from our  $\hat{R}$   
435 and rescaled baseline Rashomon sets, calculate the loss, and get the precision. We include more  
436 figures in this appendix that are similar to Figure 1 to compare with baselines using different values  
437 of  $\lambda_s$  and  $\theta$ .

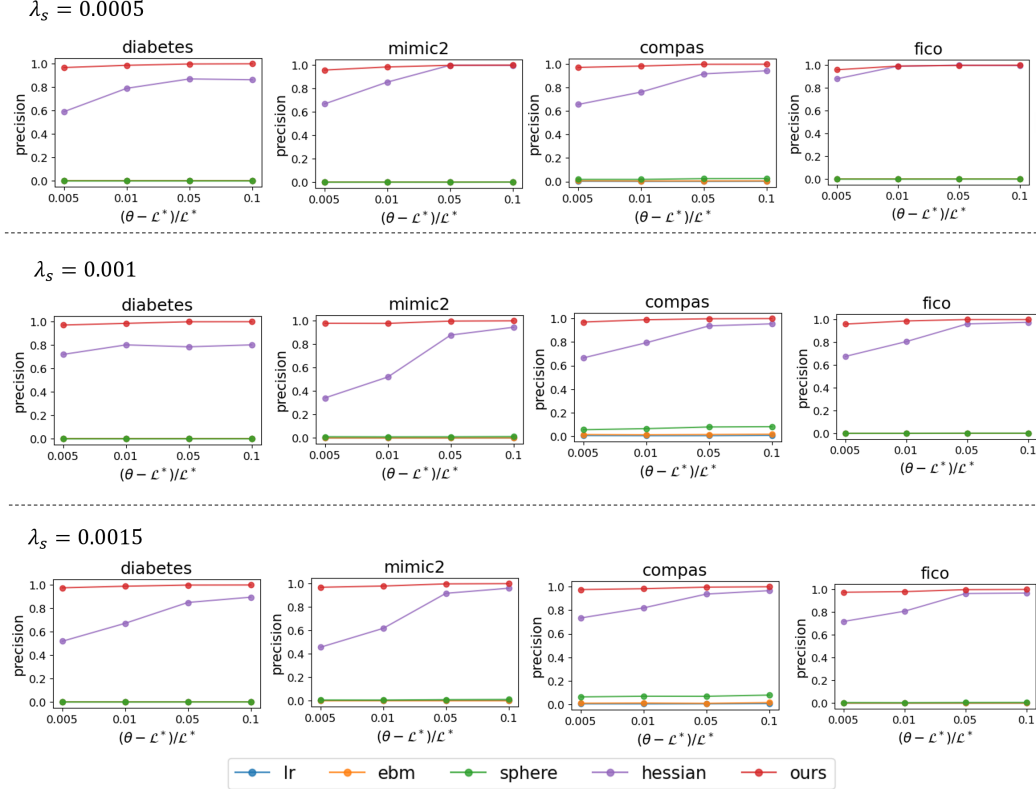

Figure 6: Precision of the approximated Rashomon sets as a function of  $\theta$ . Our method always dominates other baselines. hessian is our starting point.

438 Figure 6 compares the precision of our method and baselines when the volume is fixed. The Rashomon  
439 set approximated by our method has the largest intersection with the true Rashomon set. This pattern  
440 is consistent across all datasets and values of  $\lambda_s$ . The Rashomon set approximated by the Hessian  
441 has lower precision but is always better than the other baselines. As  $\theta$  becomes larger, the Hessian  
442 method becomes better and sometimes comes close to the result after optimization.

443 Figure 7 shows the tradeoff between the size and precision of the approximated Rashomon set for  
444 each method. The Rashomon set approximated by our optimization method is better than baselines  
445 given different values of  $\theta$ .

446 We also report the optimization time of our method and baselines in Table 2. In most cases, our  
447 proposed method has a run time slightly longer than logistic regression with bootstrapping but shorter  
448 than the EBM baseline. Baselines “hessian” and “sphere” do not require the optimization step, so  
449 they finish instantaneously. For this table, we ran the gradient descent on a CPU, whereas had we  
450 used GPU, it would be at least 10x faster.

451 Though we show that our method can find the ellipsoid with high precision, one may still wonder how  
452 well the ellipsoid approximates the true Rashomon set using other metrics. To answer this question,  
453 we show the scaling ratio that is needed to ensure points sampled from the surface of the ellipsoid  
454 are outside the true Rashomon set in Table 3. On average, each dimension needs to scale by only a

$$\theta = 1.005\mathcal{L}^*$$

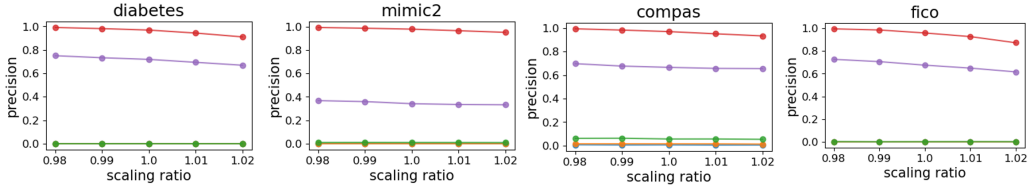

$$\theta = 1.01\mathcal{L}^*$$

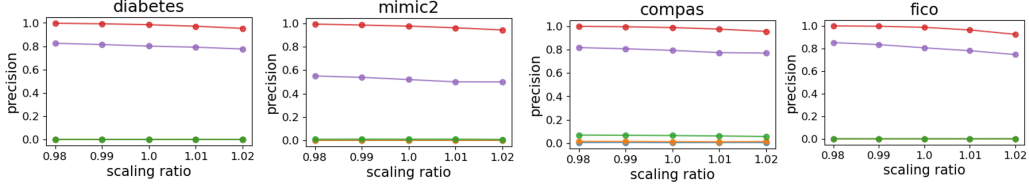

$$\theta = 1.05\mathcal{L}^*$$

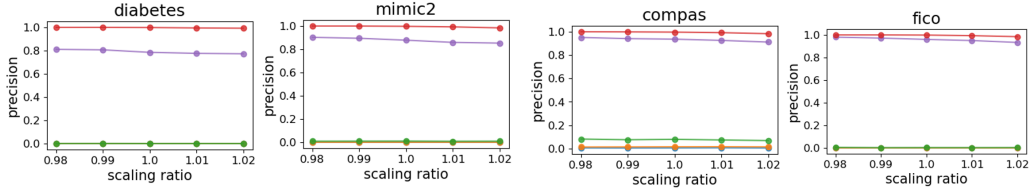

$$\theta = 1.1\mathcal{L}^*$$

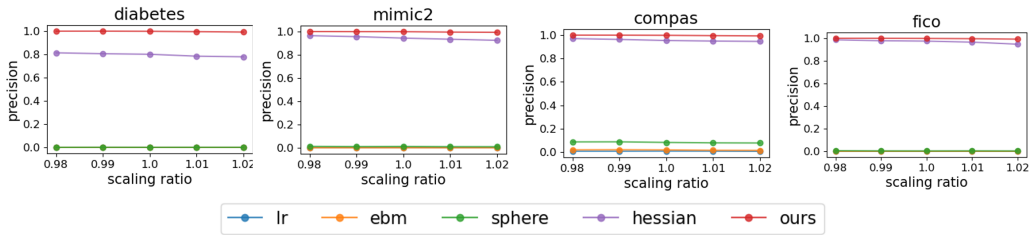

Figure 7: Tradeoff between precision and the size of the approximated Rashomon set given different  $\theta$ . Note that the scaling factor to the power  $m$  is volume, which is proportional to recall. Our method dominates baselines on all datasets. As the scaling ratio increases, the precision starts to decrease.

small ratio to cover the true Rashomon set. For example,  $\sim 5\%$  is needed on FICO to cover the true Rashomon set. A small scaling ratio means our ellipsoid captures almost the whole Rashomon set, so that scaling by a small amount can cover the whole set. (Note that in practice we would not want to do this, it would be better to use our optimized approximation to the Rashomon set to avoid false positives inside the approximation.)

**GAMs with different Support Sets:** In these experiments, we keep 90%, 80%, and 70% of bins trained with  $\lambda_s = 0.0005$ ,  $\lambda_2 = 0.001$ . For the baseline method,  $C$  is set to 3000, and the learning rate and the number of iterations are set to 0.001 and 2500, respectively. Since  $\binom{K-p}{K-\bar{K}}$  could be very large, we first sample 10,000 different merging strategies and compare at most 100  $R_{P_{\bar{S}}}$ . Table 4 shows more detailed results. Merging 30% of bins for the MIMIC-II dataset leads to empty  $R_{P_{\bar{S}}}$  for 10,000 merging strategies and merging bins for the Diabetes dataset also leads to empty  $R_{P_{\bar{S}}}$ .

## D Gradient-based optimization for log determinant

As we discussed in Section 3.1, we find the maximum volume inscribed ellipsoid by optimizing Eq (6). Eq (6) is not guaranteed to be convex, but using the log determinant, we can construct a

| Dataset  | $\lambda_s$ | Ours   | LR+sampling | EBM+sampling | Hessian<br>(our initialization) | Sphere  |
|----------|-------------|--------|-------------|--------------|---------------------------------|---------|
| Diabetes | 5e-4        | 17.11  | 10.25       | 458.61       | instant                         | instant |
|          | 1e-3        | 13.27  | 7.01        | 288.87       | instant                         | instant |
|          | 1.5e-3      | 12.17  | 6.31        | 229.76       | instant                         | instant |
| MIMIC-II | 5e-4        | 437.87 | 786.85      | 3142.36      | instant                         | instant |
|          | 1e-3        | 390.49 | 576.31      | 1862.03      | instant                         | instant |
|          | 1.5e-3      | 383.91 | 572.8       | 1556.97      | instant                         | instant |
| COMPAS   | 5e-4        | 94.92  | 22.65       | 246.14       | instant                         | instant |
|          | 1e-3        | 84.61  | 18.92       | 155.77       | instant                         | instant |
|          | 1.5e-3      | 81.05  | 18.38       | 170.49       | instant                         | instant |
| FICO     | 5e-4        | 131.71 | 89.61       | 1169.73      | instant                         | instant |
|          | 1e-3        | 119.08 | 73.02       | 975.37       | instant                         | instant |
|          | 1.5e-3      | 117.14 | 68.28       | 901.0        | instant                         | instant |

Table 2: running time in seconds of our method compared to baselines using logistic regression and explainable boosting machine. Baselines “hessian” and “sphere” do not require the optimization step, so they finish instantaneously.

| $\theta$             | scaling ratio (normalized) |          |        |       |
|----------------------|----------------------------|----------|--------|-------|
|                      | Diabetes                   | MIMIC-II | COMPAS | FICO  |
| $1.005\mathcal{L}^*$ | 1.081                      | 1.145    | 1.096  | 1.014 |
| $1.01\mathcal{L}^*$  | 1.079                      | 1.111    | 1.087  | 1.020 |
| $1.05\mathcal{L}^*$  | 1.108                      | 1.076    | 1.089  | 1.041 |
| $1.1\mathcal{L}^*$   | 1.119                      | 1.078    | 1.095  | 1.048 |

Table 3: Scaling ratio needed to ensure points sampled from the surface of the ellipsoid are outside the true Rashomon set ( $\lambda_s = 0.001, \lambda_2 = 0.001$ ).

convex objective function. In this appendix, we explore how performance changes if we optimize a convex objective.

Let us first define the new objective function:

$$\min_{Q, \omega_c} -\frac{1}{2m} \log(\det(Q^{-1})) + C \cdot \mathbb{E}_{\omega \sim \hat{R}(Q, \omega_c)} [\max(\mathcal{L}(\omega) - \theta, 0)]. \quad (14)$$

Similar to Eq (6), the first term is used to maximize the volume of the ellipsoid. The volume of an ellipsoid is proportional to  $\det(Q^{-\frac{1}{2}})$ . We normalize it by  $m$ , i.e.  $(\det(Q^{-\frac{1}{2}}))^{\frac{1}{m}}$ . Maximizing this term is equivalent to minimizing  $(\det(Q^{-\frac{1}{2}}))^{-\frac{1}{m}}$ .

$Q$  is positive definite since it is the quadratic form for an ellipsoid. Then  $Q^{\frac{1}{2}}$  is also positive definite and  $\det(Q^{-1}) = (\det(Q))^{-1}$ . We also know that  $\det(Q^{\frac{1}{2}}) = (\det(Q))^{\frac{1}{2}}$ . Therefore,

$$\begin{aligned} (\det(Q^{-\frac{1}{2}}))^{-\frac{1}{m}} &= (\det(Q^{\frac{1}{2}}))^{\frac{1}{m}} \\ &= (\det(Q))^{\frac{1}{2m}} \\ &= (\det(Q^{-1}))^{-\frac{1}{2m}}. \end{aligned}$$

We can take the log on the right-hand side term, and the objective is to minimize is thus  $-\frac{1}{2m} \log(\det(Q^{-1}))$ . It is well known that the log determinant is concave. After multiplying by  $-\frac{1}{2m}$ , this term is convex.

The second term penalizes the points sampled from the ellipsoid if they are outside  $R(\theta)$ .  $\mathcal{L}(\omega)$  is convex w.r.t  $\omega$ . Then  $\mathcal{L}(\omega) - \theta$  is also convex. Finding the maximum between a convex function and a constant is convex and the expectation is known to be convex, so the second term is also convex. Therefore, the objective function is convex and we then use gradient descent to find the minimizer.

The results obtained by minimizing Eq (14) are shown in Figure 8. They are almost the same as the results shown in Figures 6 and 7. And Table 5 shows similar results compared to Table 4. These

| Dataset  | $\tilde{K}$ | precision ratio | volume ratio    | time Method 2 (sec)                 | time Method 1 (sec)  |
|----------|-------------|-----------------|-----------------|-------------------------------------|----------------------|
| COMPAS   | 15          | $1.01 \pm 0.03$ | $1.05 \pm 0.07$ | $4.84\text{e-}4 \pm 6.25\text{e-}5$ | $324.85 \pm 8.70$    |
| COMPAS   | 14          | $1.01 \pm 0.05$ | $1.12 \pm 0.12$ | $4.76\text{e-}4 \pm 9.33\text{e-}5$ | $296.51 \pm 41.46$   |
| COMPAS   | 13          | $0.99 \pm 0.01$ | $1.20 \pm 0.12$ | $4.77\text{e-}4 \pm 1.13\text{e-}4$ | $272.64 \pm 6.64$    |
| FICO     | 28          | $1.01 \pm 0.04$ | $0.90 \pm 0.06$ | $9.99\text{e-}4 \pm 4.54\text{e-}3$ | $377.10 \pm 14.95$   |
| FICO     | 26          | $0.99 \pm 0.06$ | $1.10 \pm 0.13$ | $5.59\text{e-}4 \pm 1.12\text{e-}4$ | $374.28 \pm 10.24$   |
| FICO     | 24          | $0.99 \pm 0.02$ | $1.29 \pm 0.13$ | $5.55\text{e-}4 \pm 4.04\text{e-}5$ | $297.15 \pm 8.26$    |
| MIMIC-II | 35          | $1.00 \pm 0.20$ | $0.93 \pm 0.10$ | $5.89\text{e-}4 \pm 1.72\text{e-}4$ | $1127.10 \pm 141.42$ |
| MIMIC-II | 32          | $0.99 \pm 0.01$ | $1.10 \pm 0.06$ | $5.29\text{e-}4 \pm 2.76\text{e-}5$ | $1067.50 \pm 12.90$  |

Table 4: Precision, volume, and time comparison between blocking method (Method 2) and optimization (Method 1). This table shows that Method 2 is faster for the same task while performing equally well.

486 results indicate that optimizing the convex function doesn’t bring us better results and during the  
487 experiments, we find hyperparameter tuning is even harder. Therefore, we use the previous results  
488 (optimizing the determinant, not the log determinant) in the remaining experiments.

| Dataset  | $\tilde{K}$ | precision ratio | volume ratio    | time method 2 (sec)                 | time method 1 (sec) |
|----------|-------------|-----------------|-----------------|-------------------------------------|---------------------|
| COMPAS   | 15          | $1.00 \pm 0.02$ | $1.09 \pm 0.06$ | $4.33\text{e-}4 \pm 7.14\text{e-}5$ | $158.12 \pm 4.16$   |
| COMPAS   | 14          | $1.00 \pm 0.03$ | $1.12 \pm 0.08$ | $3.23\text{e-}4 \pm 6.79\text{e-}5$ | $136.90 \pm 3.73$   |
| COMPAS   | 13          | $0.99 \pm 0.01$ | $1.20 \pm 0.12$ | $5.33\text{e-}4 \pm 1.28\text{e-}4$ | $324.19 \pm 8.71$   |
| FICO     | 28          | $1.00 \pm 0.01$ | $0.95 \pm 0.04$ | $5.04\text{e-}4 \pm 8.99\text{e-}4$ | $467.49 \pm 5.02$   |
| FICO     | 26          | $1.00 \pm 0.04$ | $1.09 \pm 0.08$ | $3.44\text{e-}4 \pm 1.04\text{e-}4$ | $465.45 \pm 5.05$   |
| FICO     | 24          | $0.99 \pm 0.01$ | $1.25 \pm 0.10$ | $3.02\text{e-}4 \pm 2.67\text{e-}5$ | $449.33 \pm 15.93$  |
| MIMIC-II | 35          | $0.99 \pm 0.01$ | $0.98 \pm 0.06$ | $6.42\text{e-}4 \pm 1.91\text{e-}4$ | $1683.11 \pm 17.64$ |
| MIMIC-II | 32          | $0.99 \pm 0.02$ | $1.05 \pm 0.03$ | $5.77\text{e-}4 \pm 4.21\text{e-}5$ | $1666.22 \pm 6.57$  |

Table 5: Precision, volume, and time comparison between blocking method (Method 2) and optimization (Method 1) trained by optimizing Eq (14). The results are almost the same as those shown in Table 4.

## 489 E Variable importance range

490 We first show more results on variable importance range and then compare the time taken to compute  
491  $VI_+$  for MIP-based formulation and LP formulation.

492 We show the shape functions of “Glucose” when the lowest and highest variable importance are  
493 achieved in Figure 3. When the importance of “Glucose” is minimized or maximized, one might be  
494 interested in how the shape function changes for other features. We show such variations in Figure 9.  
495 Most features keep the trend as  $\omega_c$  with some variation in magnitude.

496 Figure 10 shows the variable importance range on the MIMIC-II, FICO, and COMPAS datasets.  
497 For the MIMIC-II dataset (left subfigure), features “PFratio”, “GCS”, and “Age” have relatively  
498 higher  $VI_-$ , which means these features are, in general, important for GAMs in the Rashomon set.  
499 For the FICO dataset (mid subfigure), features “ExternalRiskEstimate” and “MSinceMostRecentIn-  
500 qexcl7days” have higher  $VI_-$  either fixing or not fixing other coefficients, indicating that these two  
501 features are important. Feature “prior\_count” in the COMPAS dataset has slightly higher  $VI_-$  than  
502 feature “age.”

503 As we mentioned in Section 4.1, the lower bound of variable importance  $VI_-$  is obtained by solving  
504 a linear programming problem with a quadratic constraint, while to get the upper bound of variable  
505 importance we need to solve a mixed integer programming problem. We use Python CVXPY  
506 package [35, 36] for solving LP problems and Cplex 12.8 for MIP problems. Note that as long as  
507  $M \geq 2|\omega_{j,k}|$ , the MIP formulation is valid. We set  $M$  to 200. This is usually large enough to bound  
508 the absolute value of each coefficient given that we have the  $\ell_2$  penalty. Since solving a MIP problem  
509 is usually time-consuming, we also propose another way to get  $VI_+$ . Note that it’s the absolute  
510 value in the objective that restricts us to use LP solver. Therefore, we enumerate all positive-negative

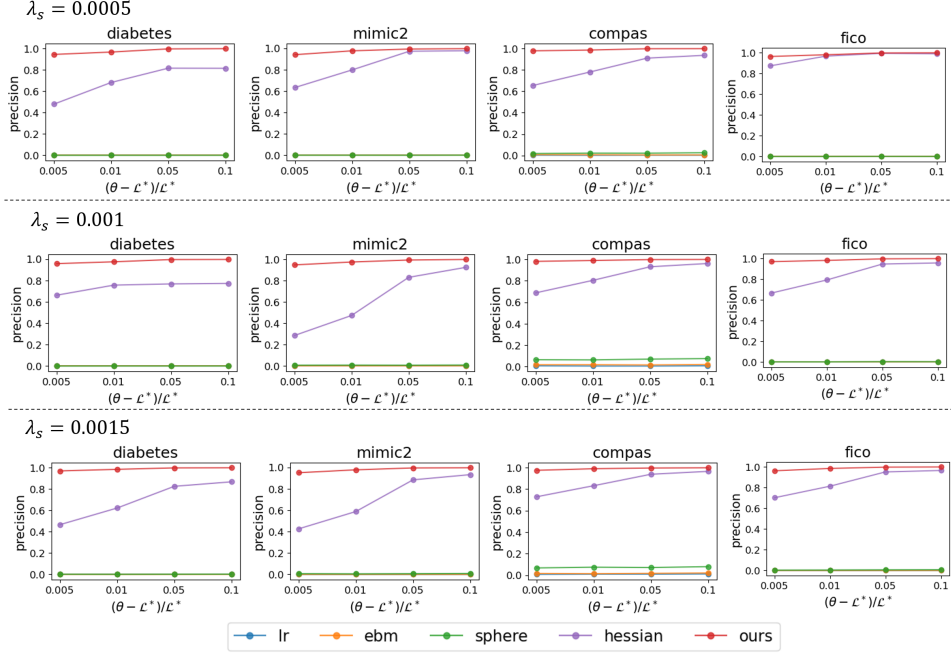

(a) Precision of the approximated Rashomon set as a function of  $\theta$ .

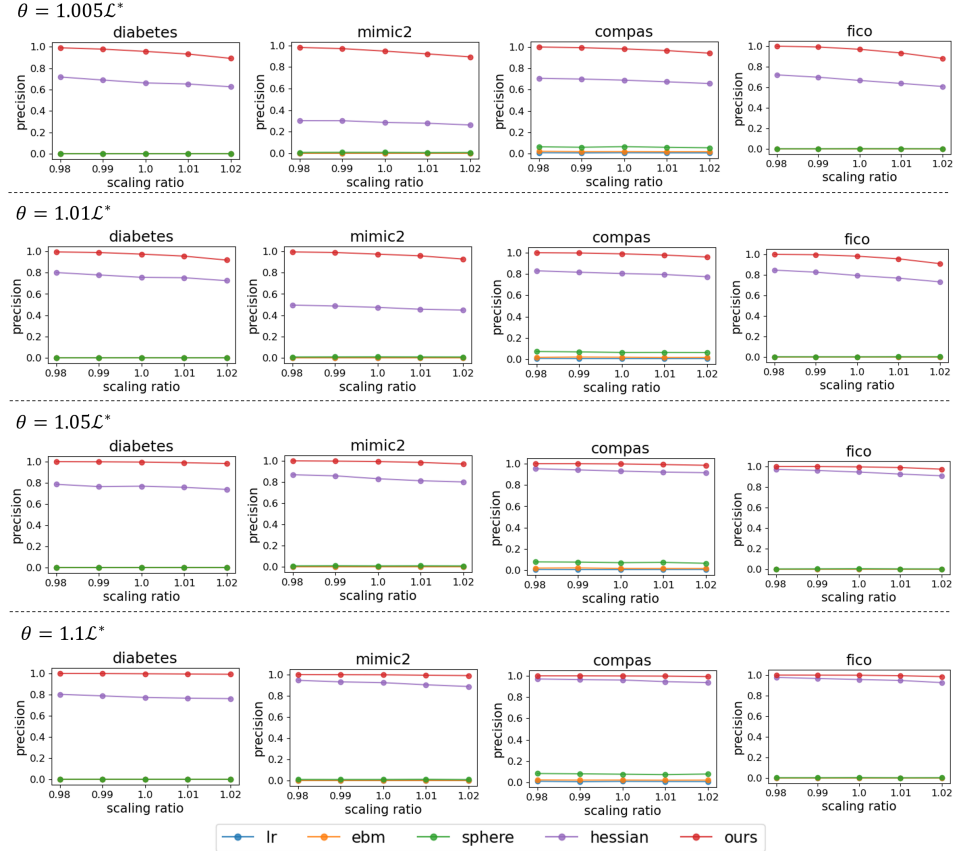

(b) Tradeoff between precision and the size of the approximated Rashomon set given different  $\theta$ . The scaling factor to the power  $m$  is volume, which is proportional to recall.

Figure 8: Precision and volume of the approximated Rashomon set obtained by optimizing Eq (14). They are almost the same as the results shown in Figure 6 and 7.

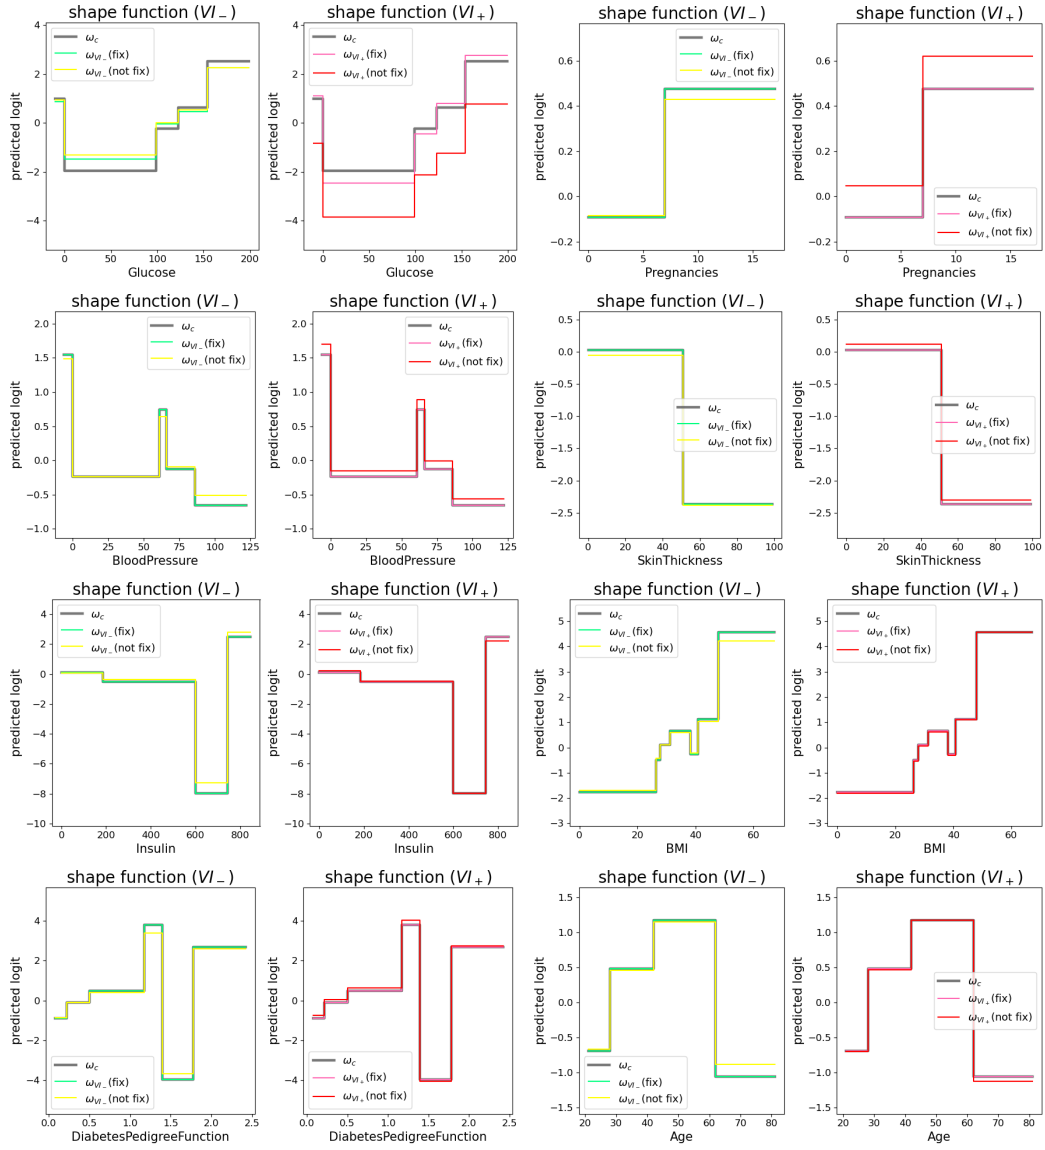

Figure 9: Shape functions of other features in the Diabetes dataset when the importance of “Glucose” is minimized or maximized.

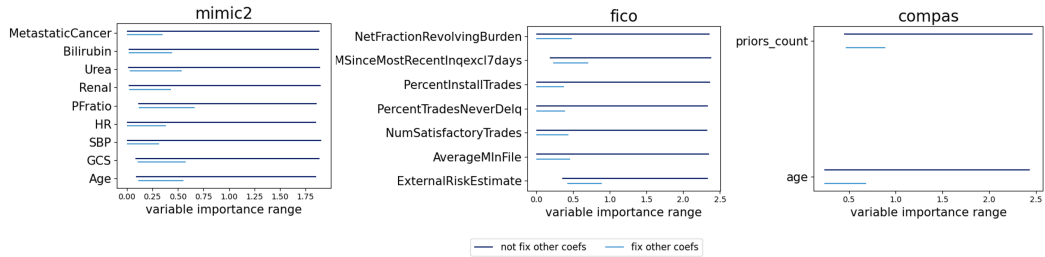

Figure 10: The variable importance range of the MIMIC-II, FICO, and COMPAS datasets. Each line connects  $VI_-$  and  $VI_+$ . ( $\lambda_s = 0.001, \lambda_2 = 0.001, \theta = 1.01\mathcal{L}^*$ )

---

**Algorithm 2** *GetVI+FromLP*( $\pi_j, Q, \omega_c$ )

---

**Input:** proportion of samples in each bin of feature  $j$   $\pi_j \in \mathbb{R}^{B_j}$ , parameters of the ellipsoid  $Q \in \mathbb{R}^{m \times m}, \omega_c \in \mathbb{R}^m$   
**Output:** a point inside the ellipsoid  $\omega \in \mathbb{R}^m$

- 1:  $Obj^* \leftarrow -\infty$
- 2: **for**  $I \in \{-1, 1\}^{B_j}$  *// try all positive-negative combinations for  $\omega_{j,k}, k \in \{0, \dots, B_j - 1\}$*   
*// solve the LP problem*
- 3:  $Obj, \omega \leftarrow \max_{\omega_j} (\pi_j \odot I)^T \omega_j$  such that  $(\omega - \omega_c)^T Q (\omega - \omega_c) \leq 1$
- 4: **if**  $Obj > Obj^*$ :
- 5:    $\omega^* \leftarrow \omega, Obj^* \leftarrow Obj$
- 6: **return**  $\omega^*$

---

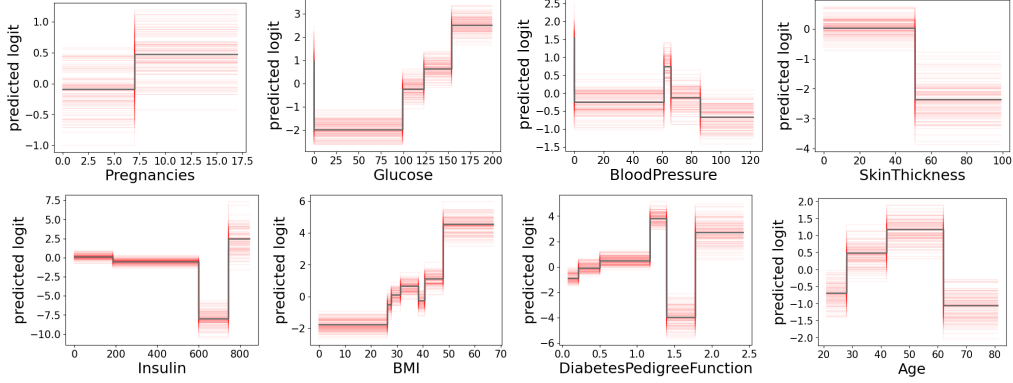

Figure 11: 100 different shape functions of the Diabetes dataset. The shape function at  $\omega_c$  is colored in gray. ( $\lambda_s = 0.001, \lambda_2 = 0.001, \theta = 1.01\mathcal{L}^*$ )

511 combinations of  $\omega_{j,k}, k \in \{0, B_j - 1\}$ , and then solve LP problem with the sign constraint enforced  
512 (see Algorithm 2). Table 6 compares the running time by solving both MIP and LP problems for  
513  $VI_+$ . The runtime required to solve LP problems with the sign constraint enforced is usually less  
514 than that required to solve a MIP problem.

| Dataset  | Fix other coefs     |                   | Not fix other coefs |                   |
|----------|---------------------|-------------------|---------------------|-------------------|
|          | MIP                 | LP                | MIP                 | LP                |
| Diabetes | $18.876 \pm 10.025$ | $4.780 \pm 4.996$ | $35.597 \pm 17.413$ | $1.961 \pm 2.164$ |
| MIMIC-II | $11.450 \pm 6.259$  | $0.497 \pm 0.166$ | $14.977 \pm 12.921$ | $0.265 \pm 0.139$ |
| COMPAS   | $23.193 \pm 0.176$  | $4.138 \pm 0.033$ | $46.782 \pm 5.709$  | $3.043 \pm 0.017$ |
| FICO     | $11.749 \pm 7.841$  | $0.816 \pm 0.766$ | $30.133 \pm 7.11$   | $0.425 \pm 0.457$ |

Table 6: Time comparison in seconds between solving MIP and LP problem with the sign constraint enforced for  $VI_+$ .

## 515 F Shape functions of GAMs in the Rashomon set

516 Next, we show a diverse set of coefficient vectors sampled from the approximated Rashomon set.  
517 Figure 11 and Figure 12 depict 100 coefficient vectors (in red) sampled from the ellipsoid and  $\omega_c$   
518 (in gray), the center of the optimized ellipsoid of the Diabetes and MIMIC-II dataset, respectively.  
519 Various different red lines in each subfigure indicate that the approximated Rashomon set contains  
520 many different coefficient vectors. And these models are actually within the true Rashomon sets.  
521 Many of them may generally follow similar patterns as we can see from the trend of these shape  
522 functions, while some of them may have some variations (see Figure 5). In summary, using the  
523 approximated Rashomon set, we can easily get a diverse set of shape functions for each feature.



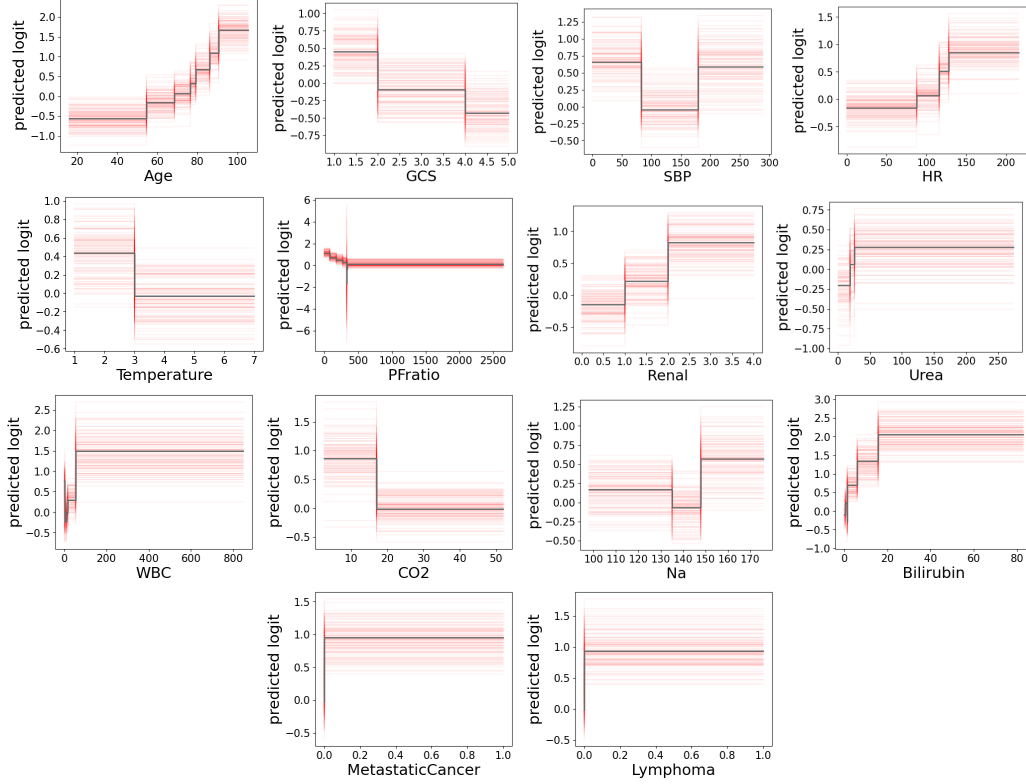

Figure 12: 100 different shape functions of the MIMIC-II dataset. The shape function at  $\omega_c$  is colored in gray. ( $\lambda_s = 0.0002, \lambda_2 = 0.001, \theta = 1.01\mathcal{L}^*$ )

## 524 G User preferred shape functions

525 In real applications, users might have preference for shape functions that are consistent with their do-  
 526 main knowledge. Our approximated Rashomon set makes it easy to incorporate such user preferences  
 527 by finding a model within the set that satisfies some constraints. We show two case studies here.

528 **Diabetes:** Figure 11 shows that a jump occurs when blood pressure is around 60. One possible user  
 529 request might be making this blood pressure shape function monotonically decreasing. By solving  
 530 the quadratic programming problem with linear constraints, we can get the shape functions colored in  
 531 yellow in Figure 13a. The updated shape function for “BloodPressure” is monotonically decreasing.  
 532 And the shape functions for other features are also updated. Almost all of them follow the trend in  
 533  $\omega_c$  (in gray), the center of the optimized ellipsoid, with small changes in magnitude. Note that this  
 534 optimization problem is solved in 0.04 seconds.

535 One might also be interested in making the shape function of “BMI” monotonically increasing. By  
 536 solving the optimization problem, we can get the shape functions shown in Figure 13b. The updated  
 537 shape function for “BMI” is monotonically increasing (in yellow). The sudden decrease that occurs at  
 538 “BMI”=40 is removed by connecting the left step. Similar to Figure 13a, the updated shape functions  
 539 of other features follow the trend in  $\omega_c$  (in gray), the center of the optimized ellipsoid, with small  
 540 changes in magnitude. And this optimization problem is solved in 0.0004 seconds.

541 Sometimes a monotonic constraint is not what users want; they might have more specific preferences  
 542 on the shape functions. Here we show some examples using hypothetical shape functions. Figure 14  
 543 extends the visualizations in Figure 4. It shows shape functions after imposing two different requests  
 544 on “BloodPressure”.

545 Figure 15 shows shape functions after imposing two different requests on “BMI.” In Figure 15a, the  
 546 requested shape function of “BMI” (colored in red in the top-left subfigure) shifts below the original  
 547 shape function but maintains a monotonically increasing pattern. While the closest shape function

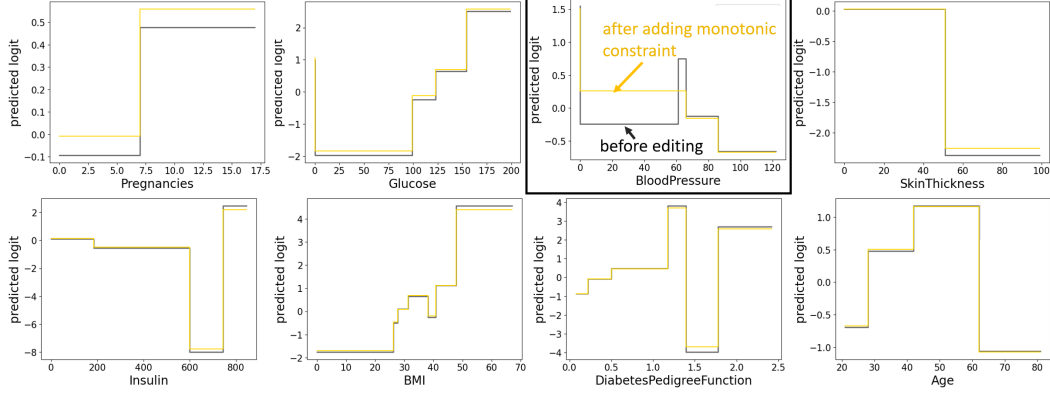

(a) Shape functions of the Diabetes dataset with the monotonic constraint on the “BloodPressure” (in yellow). The optimization problem is solved in 0.04 seconds.

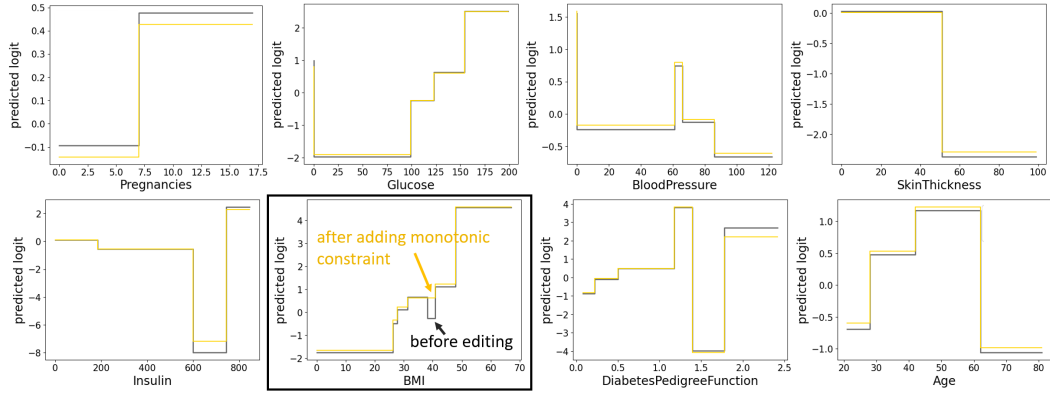

(b) Shape functions of the Diabetes dataset with the monotonic constraint on the “BMI” (in yellow). The optimization problem is solved in 0.0004 seconds.

Figure 13: Shape functions with monotonic constraints.

in the approximated Rashomon set is also below the original shape function, it is not necessarily monotonically increasing. Instead, it is more likely to follow the trend observed in the original shape function, as we aim to minimize the Euclidean distance between the requested shape function and the shape function in  $\hat{R}$ . Shape functions of other features change only slightly in magnitude. Figure 15b shows a different case. The requested shape function of “BMI” forces certain steps to have the same coefficient. However, after solving the QP problem, the updated shape function shown in green in the top-middle subfigure is a combination of the shape function before editing and the requested shape function.

**MIMIC-II:** In Figure 12, we can see jumps in several shape functions. For example, “PFRatio” has a sudden jump around 330, and “Bilirubin” has a jump close to 0. PFRatio is a measurement of lung function; it measures how well patients convert oxygen from the air into their blood. And bilirubin is a red-orange compound that breaks down heme. The bilirubin level reflects the balance between production and excretion. The elevated levels may indicate certain diseases. Missing values commonly exist in the real dataset and imputation is widely used. [28] shows these jumps are caused by mean imputation, and have no physical meaning. We can impose monotonic constraints on these two features simultaneously. We want the shape function of “PFRatio” to be monotonically decreasing, while the shape function of “Bilirubin” is monotonically increasing. Figure 16 shows the shape functions after optimization. The shape functions of “PFRatio” and “Bilirubin” satisfy the request as shown in the inset plots, and the shape functions of other features are only slightly changed.

Suppose a user prefers to remove the jump in the shape function of “PFRatio.” One way is to remove the jump while keeping the last step unchanged (top-left subfigure in Figure 17a). Fortunately, by solving Problem (12), we find that the specified shape function is within the Rashomon set (shown by

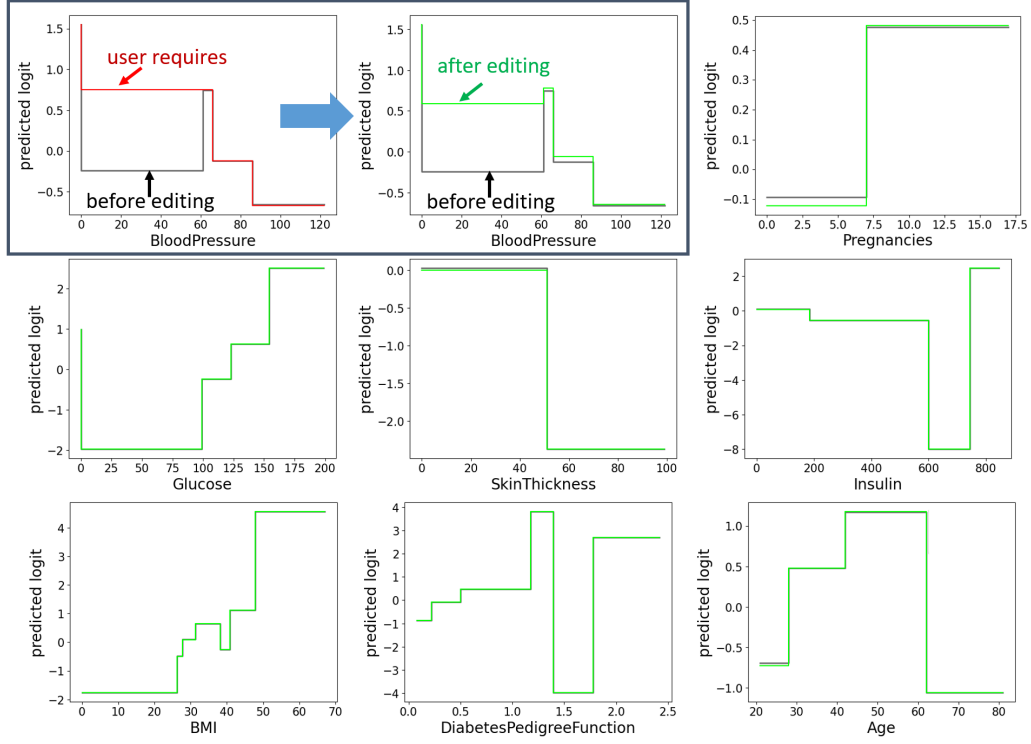

(a) Case 1

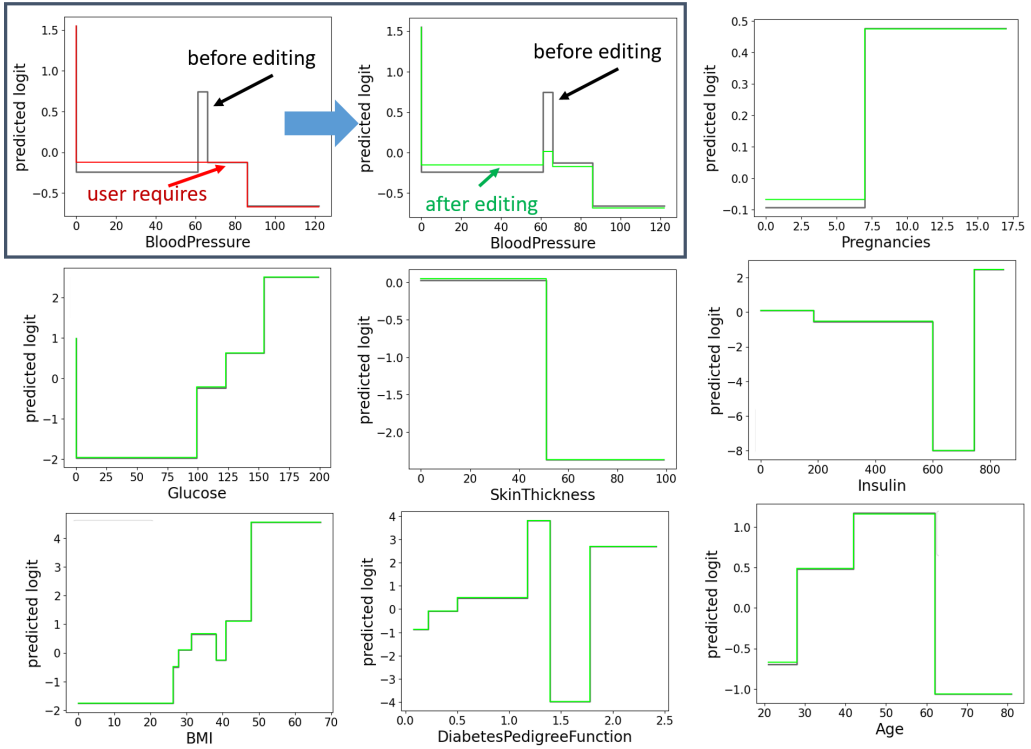

(b) Case 2

Figure 14: Shape functions on the Diabetes dataset after a hypothetical shape function on “Blood-Pressure” is requested. The red curve in the top-left subfigure is the required shape function. The shape function colored in green in the top-middle subfigure is the closest shape function within  $\hat{R}$ .

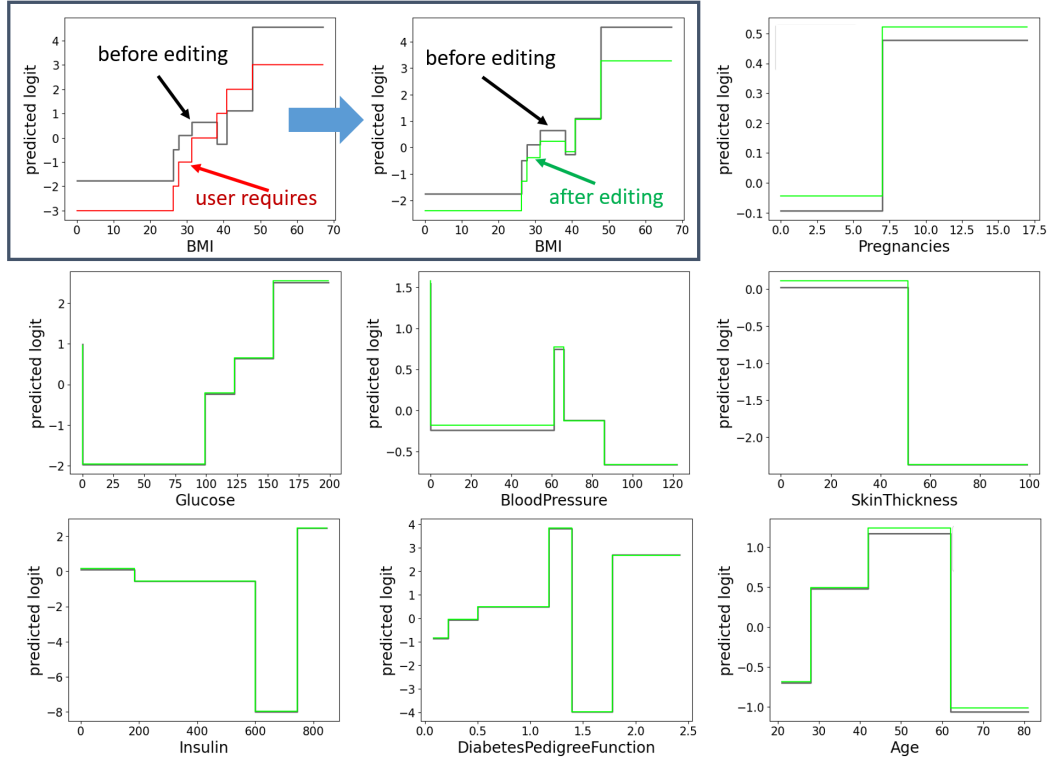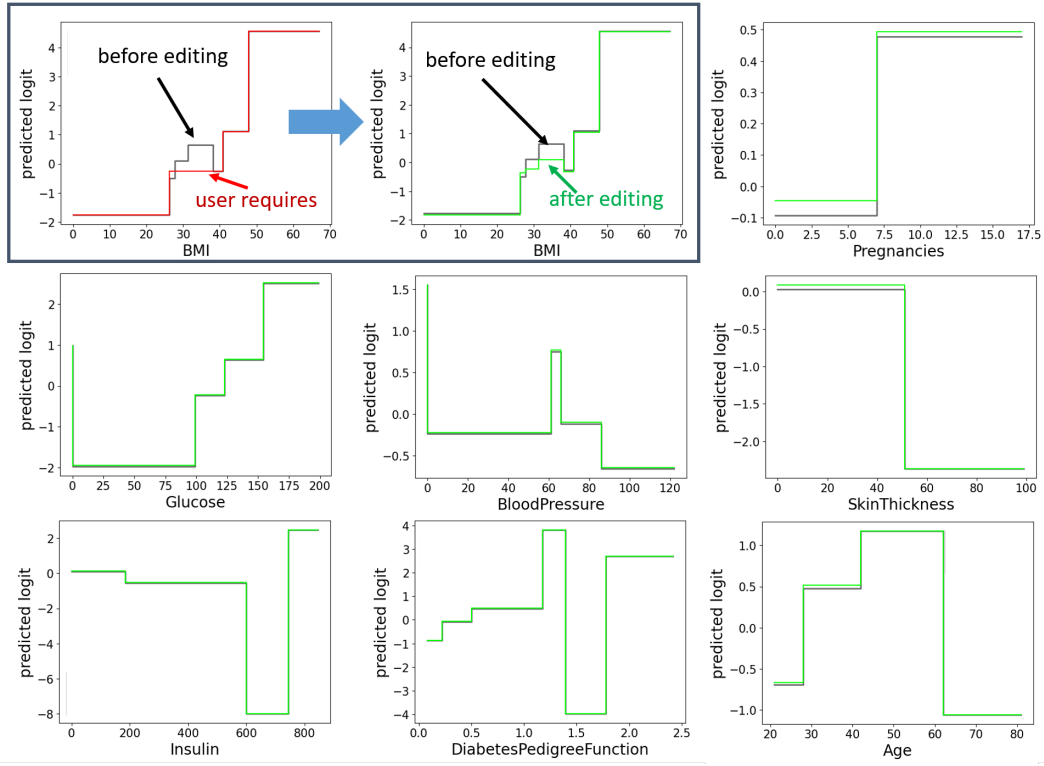

Figure 15: Shape functions on the Diabetes dataset after a hypothetical shape function on “BMI” is requested. The red curve in the top-left subfigure is the required shape function. The shape function colored in green in the top-middle subfigure is the closest shape function within  $\hat{R}$ .

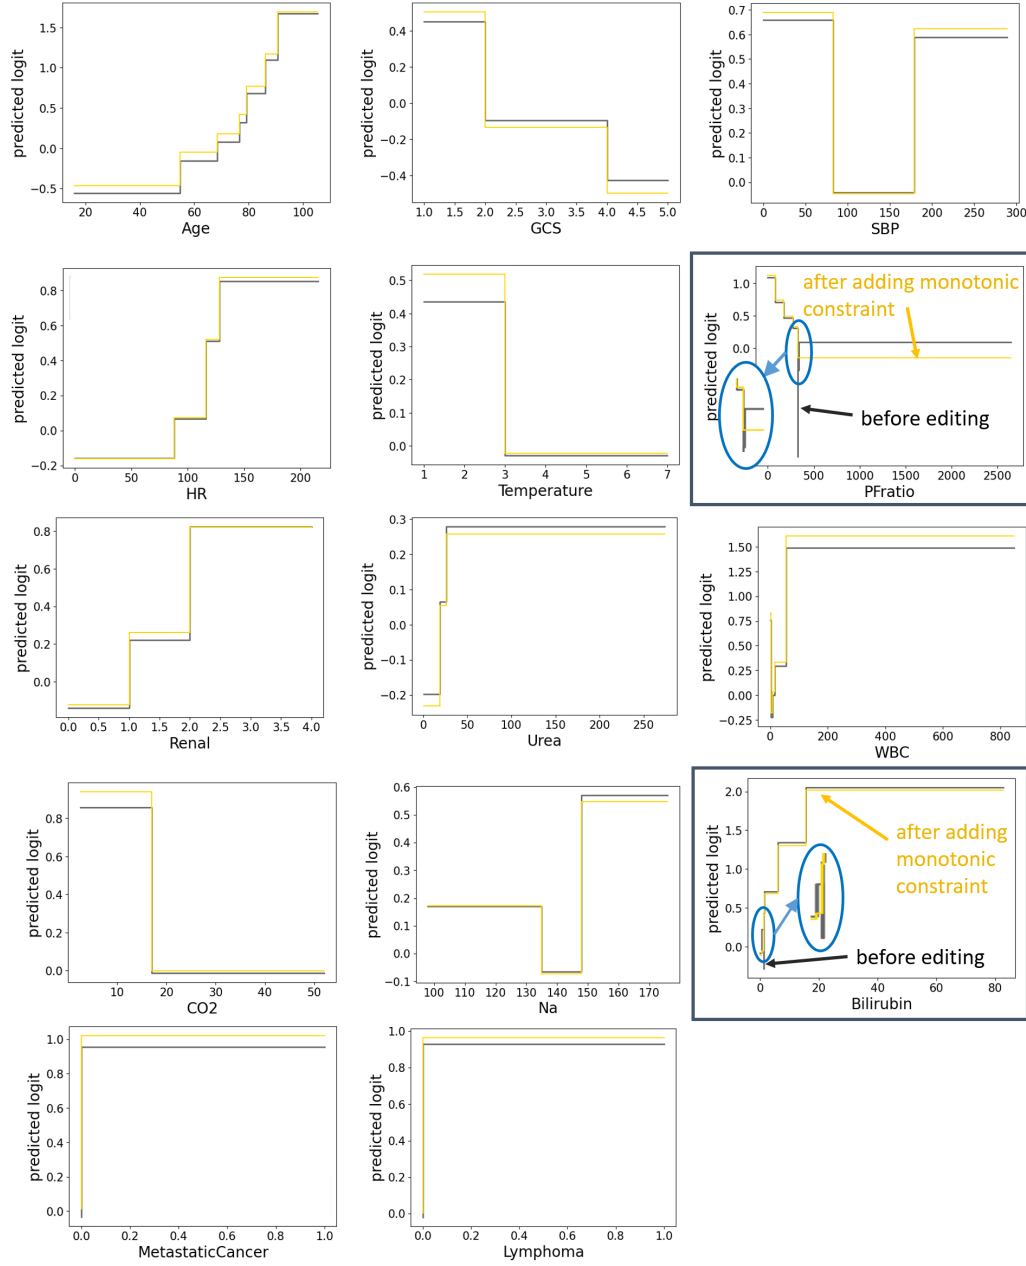

Figure 16: Shape functions of the MIMIC-II dataset with the monotonic constraints on the “PFRatio” and “Bilirubin” (in yellow).

| Dataset  | $\theta$ (constant * $\mathcal{L}^*$ ) | $\omega^*$ |       | $\omega$ sampled from $\hat{R}$ |                   |
|----------|----------------------------------------|------------|-------|---------------------------------|-------------------|
|          |                                        | accuracy   | auc   | accuracy                        | auc               |
| COMPAS   | 1.005                                  | 0.696      | 0.748 | $0.683 \pm 0.010$               | $0.744 \pm 0.004$ |
|          | 1.01                                   |            |       | $0.683 \pm 0.010$               | $0.742 \pm 0.005$ |
|          | 1.05                                   |            |       | $0.668 \pm 0.017$               | $0.724 \pm 0.012$ |
|          | 1.1                                    |            |       | $0.649 \pm 0.026$               | $0.704 \pm 0.021$ |
| FICO     | 1.005                                  | 0.720      | 0.792 | $0.717 \pm 0.003$               | $0.791 \pm 0.001$ |
|          | 1.01                                   |            |       | $0.716 \pm 0.004$               | $0.790 \pm 0.002$ |
|          | 1.05                                   |            |       | $0.708 \pm 0.008$               | $0.780 \pm 0.006$ |
|          | 1.1                                    |            |       | $0.700 \pm 0.010$               | $0.770 \pm 0.009$ |
| Diabetes | 1.005                                  | 0.760      | 0.819 | $0.761 \pm 0.004$               | $0.818 \pm 0.002$ |
|          | 1.01                                   |            |       | $0.760 \pm 0.005$               | $0.818 \pm 0.003$ |
|          | 1.05                                   |            |       | $0.758 \pm 0.011$               | $0.816 \pm 0.006$ |
|          | 1.1                                    |            |       | $0.755 \pm 0.014$               | $0.814 \pm 0.009$ |
| MIMIC-II | 1.005                                  | 0.886      | 0.803 | $0.886 \pm 0.001$               | $0.803 \pm 0.002$ |
|          | 1.01                                   |            |       | $0.886 \pm 0.001$               | $0.802 \pm 0.002$ |
|          | 1.05                                   |            |       | $0.885 \pm 0.002$               | $0.794 \pm 0.005$ |
|          | 1.1                                    |            |       | $0.884 \pm 0.003$               | $0.784 \pm 0.009$ |

Table 7: Test accuracy and AUC comparison between  $\omega^*$  and  $\omega$  sampled from the approximated Rashomon set with respect to different  $\theta$ s.

the green curve in the top-mid subfigure in Figure 17a). Another user might not like this idea and prefers to remove the jump by connecting to the left step (Figure 17b). However, this specified shape function is not within the Rashomon set, and we find the closest solution in green, which still has a small jump at 330 (see the inset plot). Different user-specified shape functions lead to different solutions. The Rashomon set can serve as a small but computationally efficient space in which users can find a model that is closest to their needs.

## H Test performance

We now show the test performance of models sampled from our approximated Rashomon set. We compare the test accuracy and AUC between  $\omega^*$  and  $\omega$ s sampled from  $\hat{R}$  on the four datasets with different values of  $\theta$  and results are shown in Table 7. We sample 1000  $\omega$  from  $\hat{R}$  and show the average and one standard deviation. The larger value of  $\theta$  leads to a larger Rashomon set, which means we allow models with higher loss. Therefore, as  $\theta$  increases, both accuracy and AUC decrease. But when the constant is slightly larger than 1, such as 1.005 and 1.01, the test performance of models sampled from  $\hat{R}$  usually covers the performance achieved by  $\omega^*$  in one standard deviation. This means in general our approximated Rashomon set can return a diverse set of models without compromising the performance.

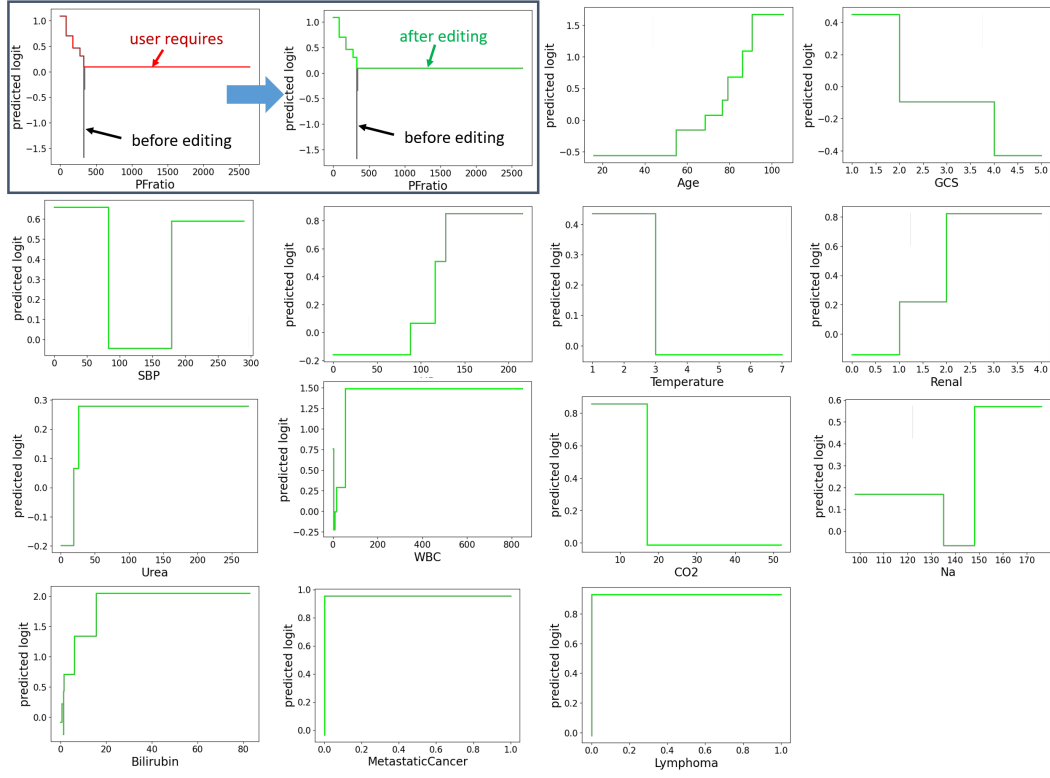

(a) Case 1

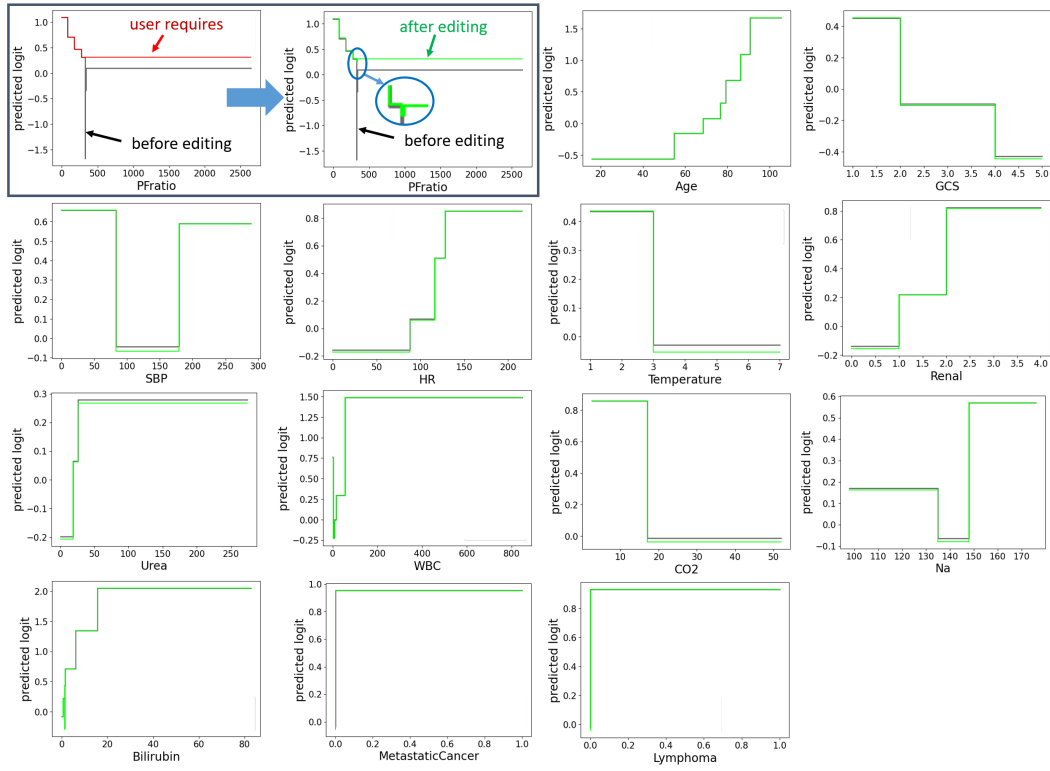

(b) Case 2

Figure 17: Shape functions on the MIMIC-II dataset after a hypothetical shape function on “PFRatio” is requested. The red curve in the top-left subfigure is the requested shape function. The shape function colored in green in the top-middle subfigure is the closest shape function within  $\hat{R}$ .
